# Supplementary material for: Temperature-sensing luminescent materials La9.67Si6O26.5:Yb3+–Er3+/Ho3+ based on pump-power-dependent upconversion luminescence
Source: Royal Society of Chemistry journal article supplement (doi:10.1039/d0qi01058h), 2020-01-01
Supplement: d0qi01058h1.pdf [file d0qi01058h1.pdf]

Temperature-sensing luminescent materials  $\text{La}_{9.67}\text{Si}_6\text{O}_{26.5}:\text{Yb}^{3+}\text{-Er}^{3+}/\text{Ho}^{3+}$

based on pump-power-dependent upconversion luminescence

Jia Zhang<sup>1,2,\*</sup>, Jiajun Chen<sup>1</sup>, Yining Zhang<sup>1</sup>

<sup>1</sup>Physics department and Jiangsu Key Laboratory of Modern Measurement  
Technology and Intelligence, Huaiyin Normal University, 111 West Chang Jiang  
Road, Huai'an 223300, China

<sup>2</sup>Jiangsu Key Laboratory for Chemistry of Low-Dimensional Materials, Huaiyin  
Normal University, 111 West Chang Jiang Road, Huai'an 223300, China

\*Corresponding author.

E-mail address: [zhangjianew@126.com](mailto:zhangjianew@126.com)

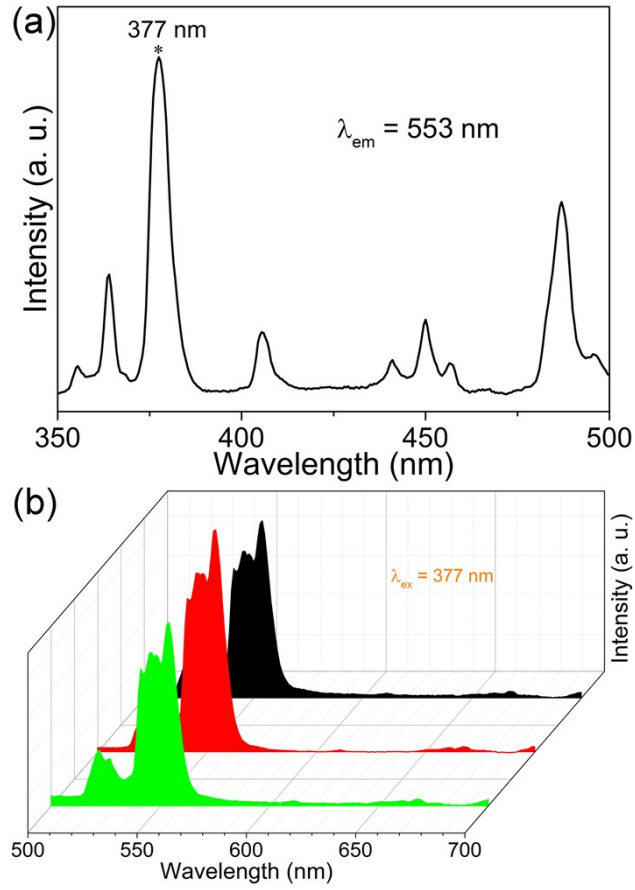

Figure S1 (a) Excitation spectrum of LSO:10%Yb<sup>3+</sup>,1%Er<sup>3+</sup> monitored by 553 nm; (b) emission spectra of LSO:10%Yb<sup>3+</sup>,xHo<sup>3+</sup> (1% ≤ x ≤ 3%) upon 377 nm excitation

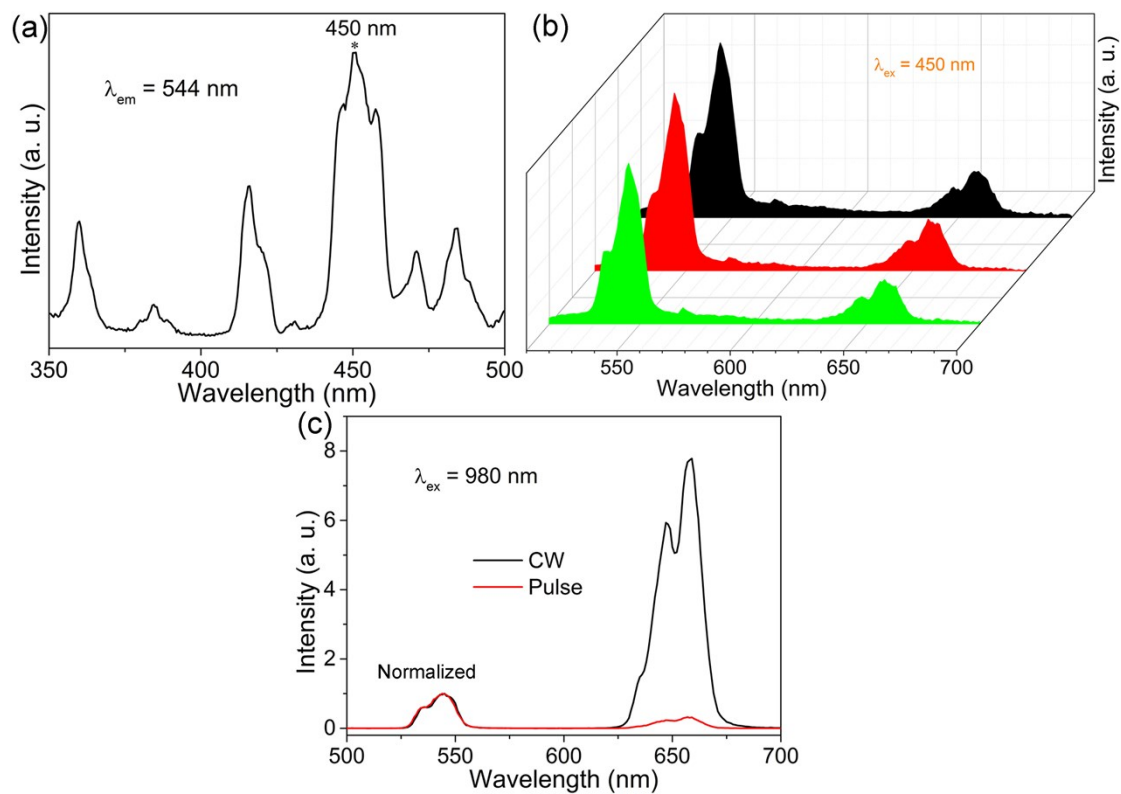

Figure S2 (a) Excitation spectrum of LSO:10%Yb<sup>3+</sup>,1%Ho<sup>3+</sup> monitored by 544 nm; (b) emission spectra of LSO:10%Yb<sup>3+</sup>,yHo<sup>3+</sup> (1% ≤ y ≤ 3%) upon 450 nm excitation; (c) normalized (for 544 nm) emission spectra of LSO:10%Yb<sup>3+</sup>,1%Ho<sup>3+</sup> excited by CW and pulse light source of 980 nm

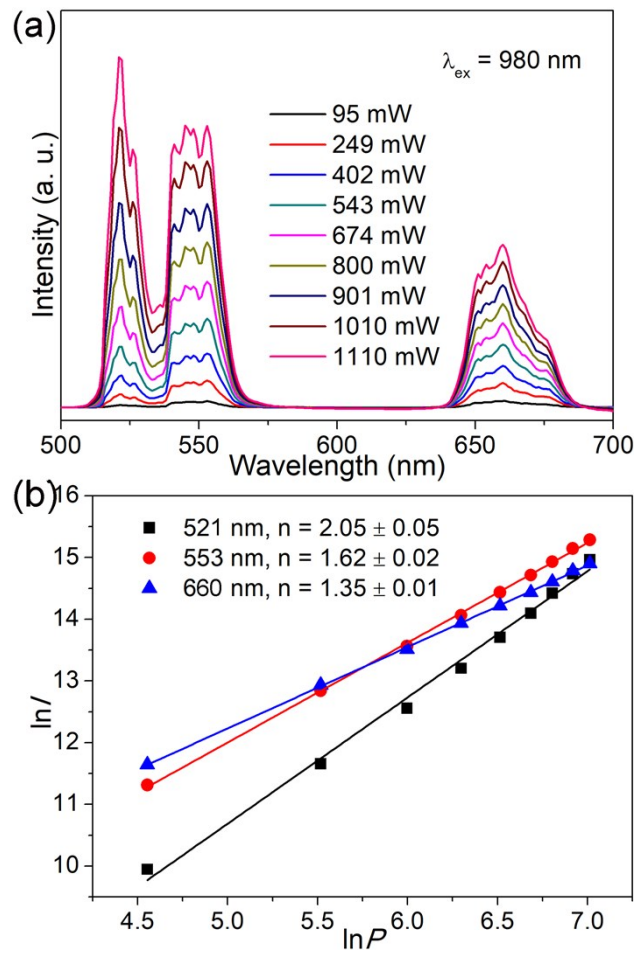

Figure S3 Emission spectra of LSO:10%Yb<sup>3+</sup>,1%Er<sup>3+</sup> excited at 980 nm excitation under various pump powers; (b) dependences of  $\ln I$  for 522, 553 and 657 nm emissions of Er<sup>3+</sup> on  $\ln P$

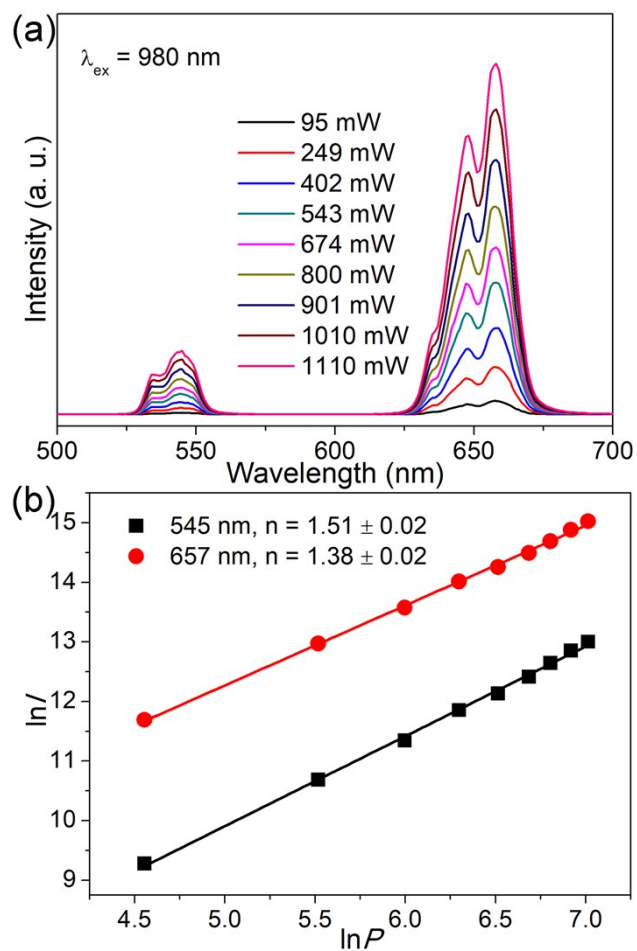

Figure S4 Emission spectra of LSO:10%Yb<sup>3+</sup>, 1%Ho<sup>3+</sup> excited at 980 nm excitation under various pump powers; (b) dependences of  $\ln I$  for 545 and 657 nm emissions of Ho<sup>3+</sup> on  $\ln P$

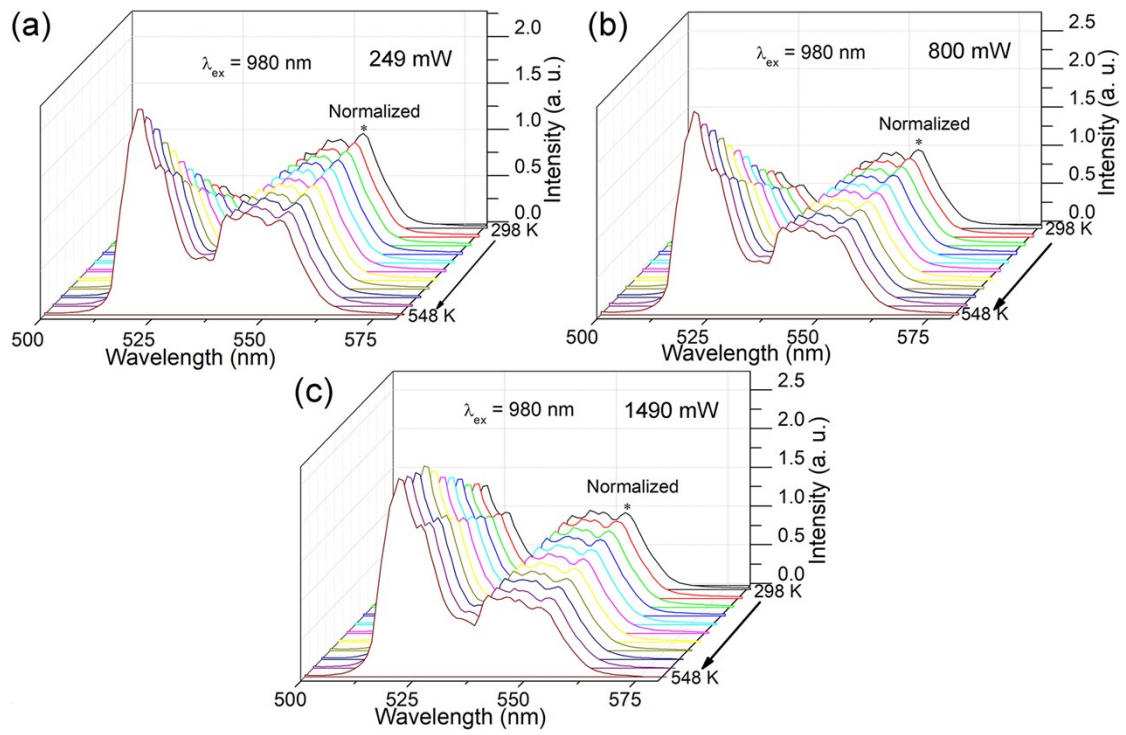

Figure S5 Normalized emission spectra of LSO:10%Yb<sup>3+</sup>,1%Er<sup>3+</sup> excited under various temperatures for the pump power of (a) 249 mW, (b) 800 mW and (c) 1490

mW

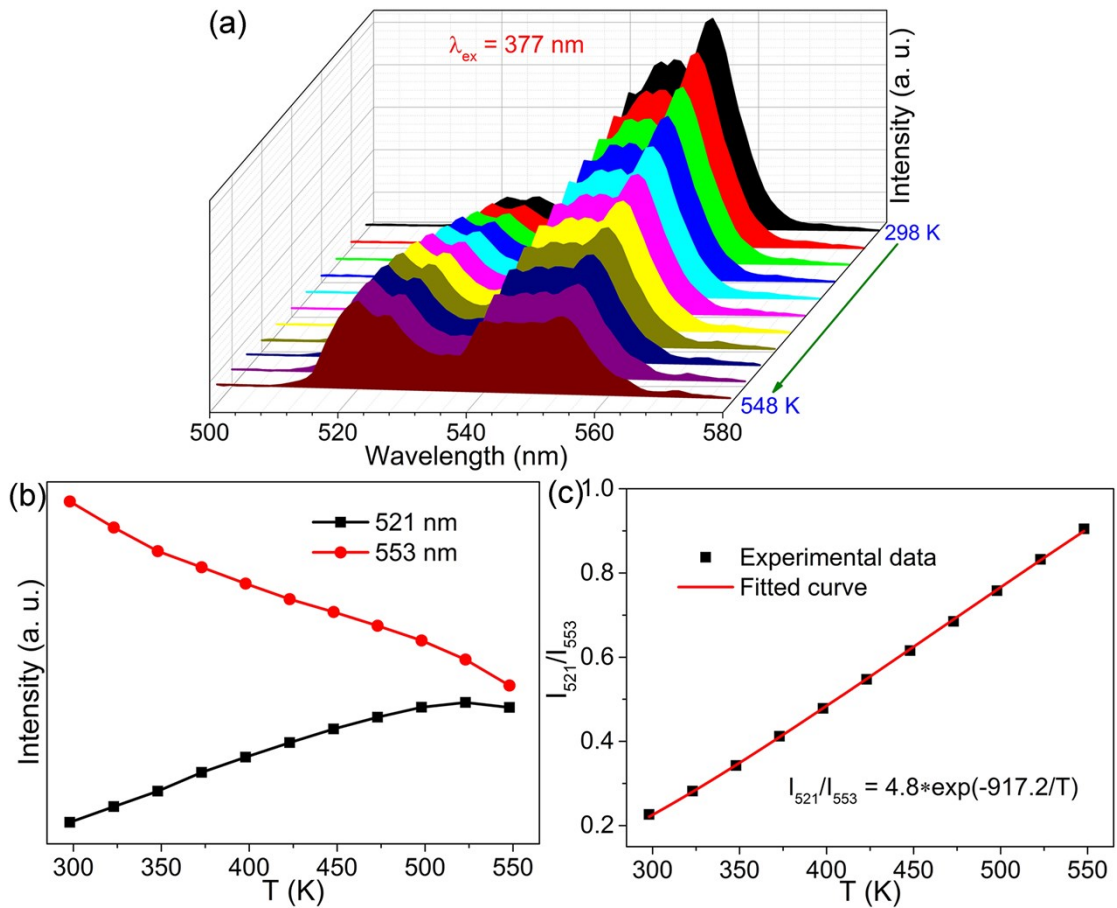

Figure S6 (a) Emission spectra of LSO:10%Yb<sup>3+</sup>, 1%Er<sup>3+</sup> excited at 377 nm under various temperatures; (b) relative intensities of 521 and 553 nm emissions of Er<sup>3+</sup> as a function of temperature; (c) dependence of  $I_{521}/I_{553}$  on absolute temperature

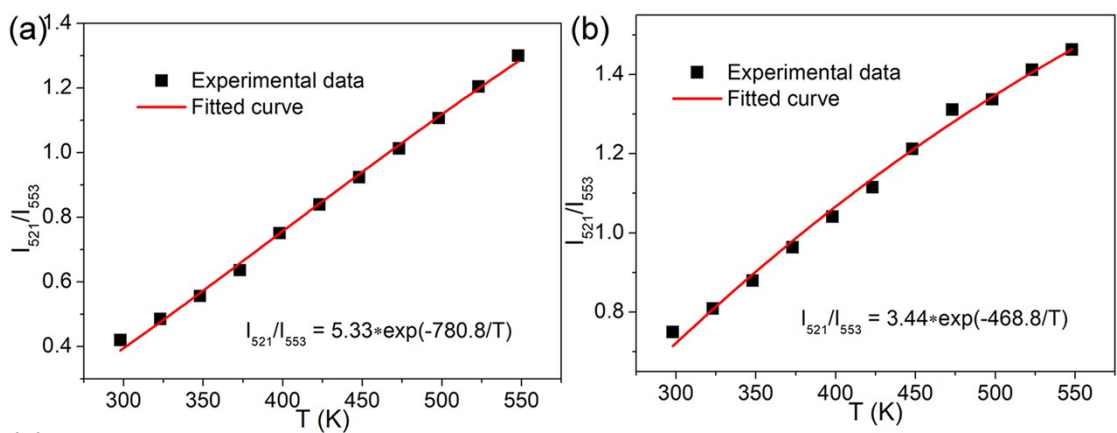

Figure S7 Dependences of  $I_{521}/I_{553}$  on absolute temperature for LSO:10%Yb<sup>3+</sup>, 1%Er<sup>3+</sup> excited under the pump power of (a) 800 mW and (b) 1490 mW

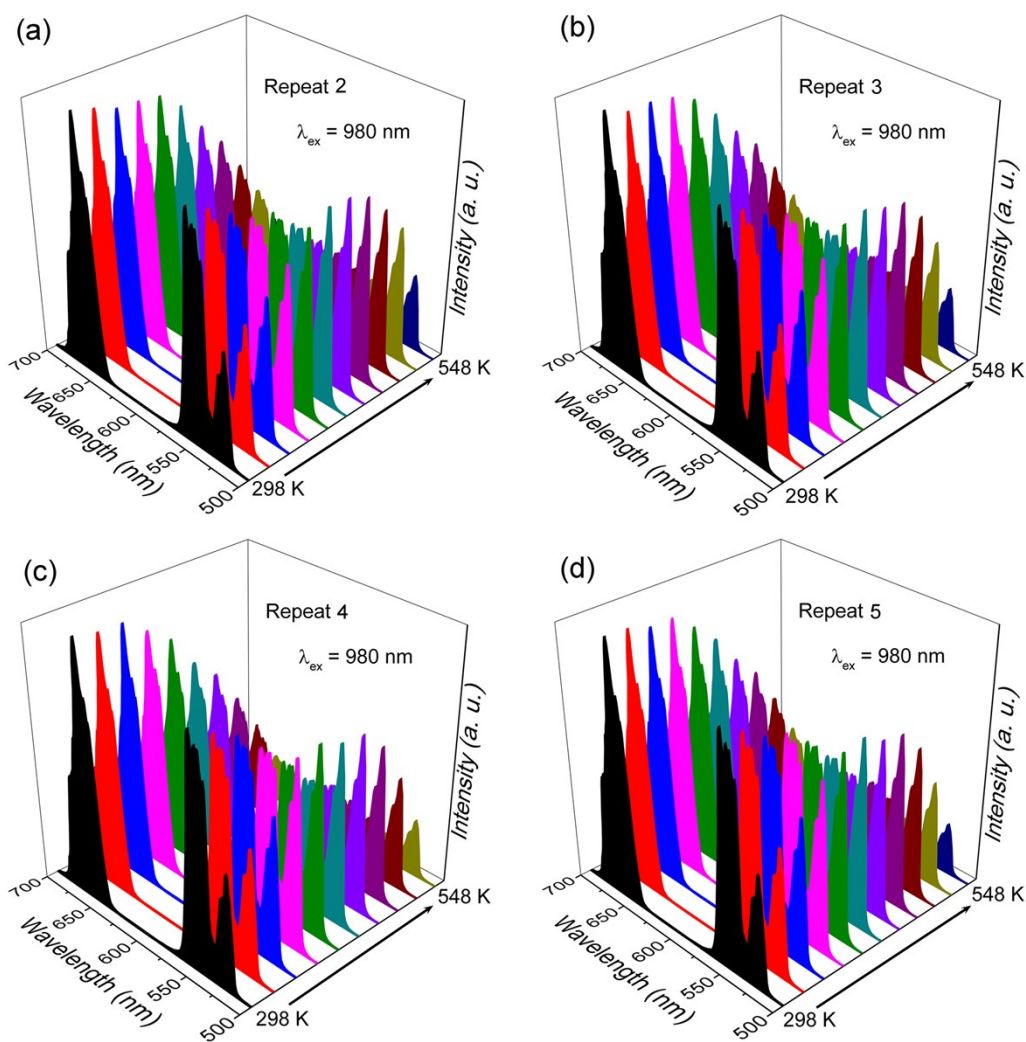

Figure S8 Emission spectra of LSO:10%Yb<sup>3+</sup>,1%Er<sup>3+</sup> by repeating the measurement excited by 980 nm of 249 mW under various temperatures

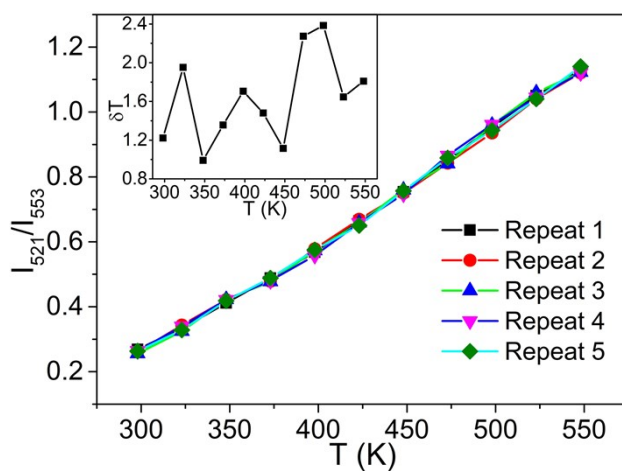

Figure S9 Dependences of  $I_{521}/I_{553}$  on absolute temperature for repeating measurement,

inset shows the  $\delta T$  value as a function of temperature



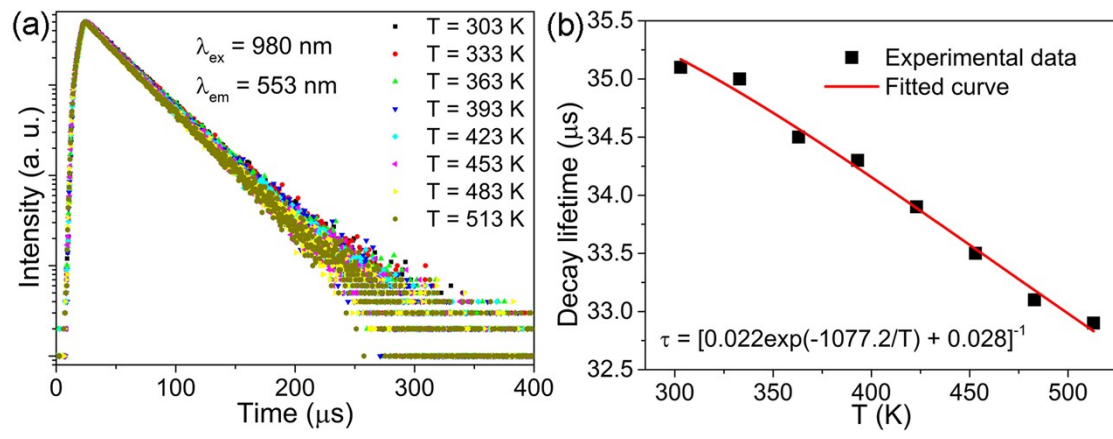

Figure S10 (a) Decay curves of LSO:10%Yb<sup>3+</sup>,1%Er<sup>3+</sup> excited at 980 nm and monitored at 553 nm; (b) dependence of decay lifetime on temperature
